# Supplementary material
Source: publisher figshare collection journal article supplement (https://wiley.figshare.com/articles/dataset/_/3521228)
Supplement: Supplementary file 1 [file 1]

**Appendix B.** Ranking of candidate models for changes in functional composition with land use.

Models with  $\Delta AIC \leq 2$  are shown in bold, along with the sign of the estimated effects for the model terms. All models include site as a random effect in the model. See Material and Methods for details about individual variables and the selection of candidate model sets.

*a) Overstory*

**Table B1.** Candidate model rankings for overstory maximum height.

| Model                                        | K        | AICc         | $\Delta AICc$ | AICc weight | Cumulative weight | Log likelihood |
|----------------------------------------------|----------|--------------|---------------|-------------|-------------------|----------------|
| <b>Grass cover (-)</b>                       | <b>4</b> | <b>84.03</b> | <b>0</b>      | <b>0.21</b> | <b>0.21</b>       | <b>-35.79</b>  |
| <b>Site only</b>                             | <b>3</b> | <b>84.23</b> | <b>0.2</b>    | <b>0.19</b> | <b>0.4</b>        | <b>-37.92</b>  |
| <b>PC2 (+)</b>                               | <b>4</b> | <b>84.65</b> | <b>0.62</b>   | <b>0.15</b> | <b>0.55</b>       | <b>-36.1</b>   |
| <b>Grass cover (-) &amp; Livestock (-)</b>   | <b>5</b> | <b>85.36</b> | <b>1.33</b>   | <b>0.11</b> | <b>0.66</b>       | <b>-33.93</b>  |
| Livestock                                    | 4        | 87.14        | 3.11          | 0.04        | 0.7               | -37.35         |
| PC1                                          | 4        | 87.18        | 3.15          | 0.04        | 0.74              | -37.37         |
| Fire                                         | 4        | 87.29        | 3.26          | 0.04        | 0.78              | -37.42         |
| Canopy openness                              | 4        | 87.55        | 3.52          | 0.04        | 0.82              | -37.55         |
| Grass cover & LUI                            | 5        | 87.59        | 3.56          | 0.04        | 0.85              | -35.04         |
| LUI                                          | 4        | 87.64        | 3.61          | 0.03        | 0.89              | -37.6          |
| PC1 & PC2                                    | 5        | 87.96        | 3.93          | 0.03        | 0.92              | -35.23         |
| Biomass extraction                           | 4        | 88.12        | 4.09          | 0.03        | 0.94              | -37.84         |
| Elevation                                    | 4        | 88.27        | 4.24          | 0.02        | 0.97              | -37.91         |
| Grass cover & Biomass extraction             | 5        | 88.84        | 4.81          | 0.02        | 0.99              | -35.67         |
| Grass cover & Biomass extraction & Livestock | 6        | 90.36        | 6.33          | 0.01        | 1                 | -33.18         |
| Biomass extraction & Livestock               | 5        | 92.31        | 8.28          | 0           | 1                 | -37.4          |

**Table B2.** Candidate model rankings for overstory physical defense.

| Model                | K        | AICc          | $\Delta AICc$ | AICc weight | Cumulative weight | Log likelihood |
|----------------------|----------|---------------|---------------|-------------|-------------------|----------------|
| <b>Elevation (-)</b> | <b>4</b> | <b>-18.68</b> | <b>0</b>      | <b>0.25</b> | <b>0.25</b>       | <b>15.56</b>   |
| <b>Site only</b>     | <b>3</b> | <b>-18.67</b> | <b>0.01</b>   | <b>0.24</b> | <b>0.49</b>       | <b>13.54</b>   |
| <b>PC1 (-)</b>       | <b>4</b> | <b>-17.44</b> | <b>1.25</b>   | <b>0.13</b> | <b>0.62</b>       | <b>14.94</b>   |
| <b>PC2 (+)</b>       | <b>4</b> | <b>-17.09</b> | <b>1.59</b>   | <b>0.11</b> | <b>0.73</b>       | <b>14.77</b>   |
| Canopy openness      | 4        | -16.64        | 2.04          | 0.09        | 0.82              | 14.54          |
| PC1 & PC2            | 5        | -15.46        | 3.22          | 0.05        | 0.87              | 16.48          |
| Fire                 | 4        | -15.18        | 3.5           | 0.04        | 0.91              | 13.81          |
| Livestock            | 4        | -14.84        | 3.84          | 0.04        | 0.95              | 13.64          |
| Grass cover          | 4        | -14.63        | 4.06          | 0.03        | 0.98              | 13.54          |

**Table B3.** Candidate model rankings for overstory wood density.

| Model                                 | K        | AICc          | $\Delta$ AICc | AICc weight | Cumulative weight | Log likelihood |
|---------------------------------------|----------|---------------|---------------|-------------|-------------------|----------------|
| <b>Site only</b>                      | <b>3</b> | <b>-29.72</b> | <b>0</b>      | <b>0.41</b> | <b>0.41</b>       | <b>19.06</b>   |
| Fire                                  | 4        | -26.41        | 3.31          | 0.08        | 0.49              | 19.43          |
| PC2                                   | 4        | -26.26        | 3.46          | 0.07        | 0.56              | 19.35          |
| Biomass extraction                    | 4        | -25.98        | 3.75          | 0.06        | 0.63              | 19.21          |
| Grass cover                           | 4        | -25.84        | 3.88          | 0.06        | 0.69              | 19.14          |
| Elevation                             | 4        | -25.79        | 3.93          | 0.06        | 0.75              | 19.12          |
| Livestock                             | 4        | -25.76        | 3.96          | 0.06        | 0.8               | 19.1           |
| LUI                                   | 4        | -25.71        | 4.02          | 0.06        | 0.86              | 19.08          |
| Canopy openness                       | 4        | -25.69        | 4.03          | 0.05        | 0.91              | 19.07          |
| PC1                                   | 4        | -25.68        | 4.04          | 0.05        | 0.97              | 19.06          |
| Fire & Livestock                      | 5        | -21.53        | 8.2           | 0.01        | 0.97              | 19.51          |
| Biomass extraction & Livestock        | 5        | -21.42        | 8.3           | 0.01        | 0.98              | 19.46          |
| Fire & Biomass extraction             | 5        | -21.39        | 8.34          | 0.01        | 0.99              | 19.44          |
| Fire & LUI                            | 5        | -21.37        | 8.35          | 0.01        | 0.99              | 19.44          |
| PC1 & PC2                             | 5        | -21.21        | 8.51          | 0.01        | 1                 | 19.36          |
| Fire & Biomass extraction & Livestock | 6        | -15.26        | 14.46         | 0           | 1                 | 19.63          |

**Clonality:** Too few plots with clonally reproducing trees, so not tested.

**Table B4.** Candidate model rankings for overstory resprouting capacity.

| Model                                | K        | AICc        | $\Delta$ AICc | AICc weight | Cumulative weight | Log likelihood |
|--------------------------------------|----------|-------------|---------------|-------------|-------------------|----------------|
| <b>Site only</b>                     | <b>3</b> | <b>1.16</b> | <b>0</b>      | <b>0.4</b>  | <b>0.4</b>        | <b>3.62</b>    |
| PC2                                  | 4        | 4.18        | 3.02          | 0.09        | 0.48              | 4.13           |
| Grass cover                          | 4        | 4.68        | 3.51          | 0.07        | 0.55              | 3.88           |
| PC1                                  | 4        | 4.71        | 3.55          | 0.07        | 0.62              | 3.87           |
| Fire                                 | 4        | 4.72        | 3.56          | 0.07        | 0.69              | 3.86           |
| Biomass extraction                   | 4        | 4.92        | 3.76          | 0.06        | 0.75              | 3.76           |
| LUI                                  | 4        | 5.05        | 3.88          | 0.06        | 0.8               | 3.7            |
| Livestock                            | 4        | 5.18        | 4.02          | 0.05        | 0.86              | 3.63           |
| Elevation                            | 4        | 5.19        | 4.03          | 0.05        | 0.91              | 3.63           |
| Canopy openness                      | 4        | 5.21        | 4.04          | 0.05        | 0.96              | 3.62           |
| PC2 & Livestock                      | 5        | 8.7         | 7.54          | 0.01        | 0.97              | 4.4            |
| PC1 & PC2                            | 5        | 8.7         | 7.54          | 0.01        | 0.98              | 4.4            |
| PC2 & LUI                            | 5        | 9.01        | 7.84          | 0.01        | 0.99              | 4.25           |
| PC2 & Biomass extraction             | 5        | 9.18        | 8.02          | 0.01        | 0.99              | 4.16           |
| Biomass extraction & Livestock       | 5        | 9.95        | 8.79          | 0           | 1                 | 3.78           |
| PC2 & Biomass extraction & Livestock | 6        | 14.71       | 13.55         | 0           | 1                 | 4.65           |

**Table B5.** Candidate model rankings for overstory seed mass.

| Model                                | K        | AICc          | $\Delta$ AICc | AICc weight | Cumulative weight | Log likelihood |
|--------------------------------------|----------|---------------|---------------|-------------|-------------------|----------------|
| <b>PC1 (+)</b>                       | <b>4</b> | <b>208.21</b> | <b>0</b>      | <b>0.31</b> | <b>0.31</b>       | <b>-97.88</b>  |
| <b>Site only</b>                     | <b>3</b> | <b>209.57</b> | <b>1.36</b>   | <b>0.16</b> | <b>0.47</b>       | <b>-100.58</b> |
| <b>Elevation (+)</b>                 | <b>4</b> | <b>210.21</b> | <b>2</b>      | <b>0.11</b> | <b>0.58</b>       | <b>-98.88</b>  |
| Canopy openness                      | 4        | 210.57        | 2.36          | 0.1         | 0.68              | -99.06         |
| Grass cover                          | 4        | 211.81        | 3.6           | 0.05        | 0.73              | -99.68         |
| PC1 & Biomass extraction             | 5        | 211.81        | 3.61          | 0.05        | 0.78              | -97.16         |
| PC1 & LUI                            | 5        | 212           | 3.8           | 0.05        | 0.83              | -97.25         |
| PC1 & Livestock                      | 5        | 212.58        | 4.37          | 0.03        | 0.86              | -97.54         |
| Livestock                            | 4        | 213.18        | 4.98          | 0.03        | 0.89              | -100.37        |
| PC1 & PC2                            | 5        | 213.24        | 5.03          | 0.03        | 0.91              | -97.87         |
| Biomass extraction                   | 4        | 213.55        | 5.34          | 0.02        | 0.93              | -100.55        |
| LUI                                  | 4        | 213.57        | 5.36          | 0.02        | 0.95              | -100.56        |
| PC2                                  | 4        | 213.6         | 5.39          | 0.02        | 0.97              | -100.58        |
| Fire                                 | 4        | 213.61        | 5.4           | 0.02        | 1                 | -100.58        |
| Biomass extraction & Livestock       | 5        | 217.69        | 9.48          | 0           | 1                 | -100.09        |
| PC1 & Biomass extraction & Livestock | 6        | 218.3         | 10.1          | 0           | 1                 | -97.15         |

**Table B6.** Candidate model rankings for overstory wind dispersal.

| Model                                             | K        | AICc        | $\Delta$ AICc | AICc weight | Cumulative weight | Log likelihood |
|---------------------------------------------------|----------|-------------|---------------|-------------|-------------------|----------------|
| <b>Elevation (-) &amp; Biomass extraction (-)</b> | <b>5</b> | <b>3.99</b> | <b>0</b>      | <b>0.23</b> | <b>0.23</b>       | <b>6.75</b>    |
| <b>Elevation (-)</b>                              | <b>4</b> | <b>4.15</b> | <b>0.15</b>   | <b>0.21</b> | <b>0.43</b>       | <b>4.15</b>    |
| <b>Site only</b>                                  | <b>3</b> | <b>5.18</b> | <b>1.19</b>   | <b>0.12</b> | <b>0.56</b>       | <b>1.61</b>    |
| <b>Elevation (-) &amp; LUI (-)</b>                | <b>5</b> | <b>5.73</b> | <b>1.74</b>   | <b>0.09</b> | <b>0.65</b>       | <b>5.89</b>    |
| Canopy openness                                   | 4        | 6.16        | 2.17          | 0.08        | 0.73              | 3.14           |
| PC1                                               | 4        | 6.52        | 2.53          | 0.06        | 0.79              | 2.96           |
| Elevation & Livestock                             | 5        | 7.33        | 3.34          | 0.04        | 0.84              | 5.08           |
| Livestock                                         | 4        | 7.61        | 3.62          | 0.04        | 0.87              | 2.42           |
| Fire                                              | 4        | 8.1         | 4.11          | 0.03        | 0.9               | 2.17           |
| LUI                                               | 4        | 8.75        | 4.76          | 0.02        | 0.92              | 1.85           |
| PC2                                               | 4        | 9.1         | 5.11          | 0.02        | 0.94              | 1.67           |
| Grass cover                                       | 4        | 9.22        | 5.22          | 0.02        | 0.96              | 1.61           |
| Biomass extraction                                | 4        | 9.22        | 5.23          | 0.02        | 0.97              | 1.61           |
| Elevation & Biomass extraction & Livestock        | 6        | 9.39        | 5.4           | 0.02        | 0.99              | 7.31           |
| PC1 & PC2                                         | 5        | 11.07       | 7.08          | 0.01        | 0.99              | 3.21           |
| Biomass extraction & Livestock                    | 5        | 11.41       | 7.42          | 0.01        | 1                 | 3.05           |

**Table B7.** Candidate model rankings for overstory endozoochory.

| Model                                             | K        | AICc         | $\Delta$ AICc | AICc weight | Cumulative weight | Log likelihood |
|---------------------------------------------------|----------|--------------|---------------|-------------|-------------------|----------------|
| <b>Elevation (+) &amp; Biomass extraction (+)</b> | <b>5</b> | <b>-0.07</b> | <b>0</b>      | <b>0.4</b>  | <b>0.4</b>        | <b>8.79</b>    |
| <b>Elevation (+)</b>                              | <b>4</b> | <b>1.53</b>  | <b>1.6</b>    | <b>0.18</b> | <b>0.59</b>       | <b>5.46</b>    |
| <b>Elevation &amp; LUI (+)</b>                    | <b>5</b> | <b>1.76</b>  | <b>1.83</b>   | <b>0.16</b> | <b>0.75</b>       | <b>7.87</b>    |
| Canopy openness                                   | 4        | 3.04         | 3.11          | 0.09        | 0.83              | 4.7            |
| Elevation & Livestock                             | 5        | 3.89         | 3.96          | 0.06        | 0.89              | 6.81           |
| Site only                                         | 3        | 5.2          | 5.27          | 0.03        | 0.92              | 1.6            |
| Elevation & Biomass extraction & Livestock        | 6        | 5.52         | 5.59          | 0.02        | 0.94              | 9.24           |
| PC1                                               | 4        | 5.79         | 5.87          | 0.02        | 0.96              | 3.32           |
| Livestock                                         | 4        | 7.27         | 7.34          | 0.01        | 0.97              | 2.59           |
| LUI                                               | 4        | 8.73         | 8.8           | 0           | 0.98              | 1.86           |
| Fire                                              | 4        | 8.78         | 8.85          | 0           | 0.98              | 1.83           |
| PC2                                               | 4        | 8.99         | 9.06          | 0           | 0.99              | 1.73           |
| Grass cover                                       | 4        | 9.1          | 9.18          | 0           | 0.99              | 1.67           |
| Biomass extraction                                | 4        | 9.25         | 9.32          | 0           | 0.99              | 1.6            |
| PC1 & PC2                                         | 5        | 9.77         | 9.84          | 0           | 1                 | 3.86           |
| Biomass extraction & Livestock                    | 5        | 10.38        | 10.45         | 0           | 1                 | 3.56           |

**Overstory exozoochory:** Not tested because no exozoochorous overstory species

**b) Understory, all species included**

**Table B8.** Candidate model rankings for understory maximum height (all species included).

| Model                                | K        | AICc         | $\Delta$ AICc | AICc weight | Cumulative weight | Log likelihood |
|--------------------------------------|----------|--------------|---------------|-------------|-------------------|----------------|
| <b>PC2 (+)</b>                       | <b>4</b> | <b>79.36</b> | <b>0</b>      | <b>0.23</b> | <b>0.23</b>       | <b>-33.46</b>  |
| <b>Site only</b>                     | <b>3</b> | <b>79.73</b> | <b>0.37</b>   | <b>0.19</b> | <b>0.43</b>       | <b>-35.67</b>  |
| <b>Elevation (-)</b>                 | <b>4</b> | <b>80.52</b> | <b>1.16</b>   | <b>0.13</b> | <b>0.56</b>       | <b>-34.04</b>  |
| Biomass extraction                   | 4        | 81.66        | 2.3           | 0.07        | 0.63              | -34.61         |
| Grass cover                          | 4        | 81.93        | 2.57          | 0.06        | 0.7               | -34.74         |
| PC1                                  | 4        | 83.04        | 3.68          | 0.04        | 0.74              | -35.3          |
| Fire                                 | 4        | 83.21        | 3.85          | 0.03        | 0.77              | -35.38         |
| Canopy openness                      | 4        | 83.25        | 3.89          | 0.03        | 0.8               | -35.4          |
| PC1 & PC2                            | 5        | 83.4         | 4.04          | 0.03        | 0.84              | -32.95         |
| LUI                                  | 4        | 83.47        | 4.11          | 0.03        | 0.87              | -35.51         |
| PC2 & Biomass extraction             | 5        | 83.48        | 4.12          | 0.03        | 0.9               | -32.99         |
| Livestock                            | 4        | 83.51        | 4.15          | 0.03        | 0.92              | -35.53         |
| Biomass extraction & Livestock       | 5        | 83.69        | 4.33          | 0.03        | 0.95              | -33.09         |
| PC2 & LUI                            | 5        | 83.78        | 4.42          | 0.03        | 0.98              | -33.14         |
| PC2 & Livestock                      | 5        | 84.14        | 4.78          | 0.02        | 1                 | -33.32         |
| PC2 & Biomass extraction & Livestock | 6        | 89.71        | 10.35         | 0           | 1                 | -32.86         |

**Table B9.** Candidate model rankings for understory physical defense (all species included).

| Model                              | K        | AICc          | $\Delta$ AICc | AICc weight | Cumulative weight | Log likelihood |
|------------------------------------|----------|---------------|---------------|-------------|-------------------|----------------|
| <b>Livestock (+)</b>               | <b>4</b> | <b>-13.02</b> | <b>0</b>      | <b>0.25</b> | <b>0.25</b>       | <b>12.73</b>   |
| <b>PC2 (-)</b>                     | <b>4</b> | <b>-12.49</b> | <b>0.54</b>   | <b>0.19</b> | <b>0.44</b>       | <b>12.47</b>   |
| <b>Grass cover (-)</b>             | <b>4</b> | <b>-11.76</b> | <b>1.26</b>   | <b>0.13</b> | <b>0.57</b>       | <b>12.1</b>    |
| <b>Site only</b>                   | <b>3</b> | <b>-11.48</b> | <b>1.54</b>   | <b>0.11</b> | <b>0.68</b>       | <b>9.94</b>    |
| <b>Canopy openness (+)</b>         | <b>4</b> | <b>-11.38</b> | <b>1.64</b>   | <b>0.11</b> | <b>0.79</b>       | <b>11.91</b>   |
| <b>PC2 (-) &amp; Livestock (+)</b> | <b>5</b> | <b>-11.04</b> | <b>1.99</b>   | <b>0.09</b> | <b>0.88</b>       | <b>14.27</b>   |
| Elevation                          | 4        | -10.23        | 2.79          | 0.06        | 0.94              | 11.34          |
| PC1 & PC2                          | 5        | -9.03         | 3.99          | 0.03        | 0.98              | 13.27          |
| PC1                                | 4        | -8.2          | 4.82          | 0.02        | 1                 | 10.32          |

**Table B10.** Candidate model rankings for understory clonality (all species included).

| Model                                        | K        | AICc         | $\Delta$ AICc | AICc weight | Cumulative weight | Log likelihood |
|----------------------------------------------|----------|--------------|---------------|-------------|-------------------|----------------|
| <b>Grass cover (+)</b>                       | <b>4</b> | <b>-3.4</b>  | <b>0</b>      | <b>0.21</b> | <b>0.21</b>       | <b>7.92</b>    |
| <b>Grass cover (+) &amp; Livestock (-)</b>   | <b>5</b> | <b>-3.13</b> | <b>0.27</b>   | <b>0.19</b> | <b>0.4</b>        | <b>10.32</b>   |
| <b>Site only</b>                             | <b>3</b> | <b>-3.12</b> | <b>0.28</b>   | <b>0.18</b> | <b>0.58</b>       | <b>5.76</b>    |
| <b>Livestock (-)</b>                         | <b>4</b> | <b>-1.5</b>  | <b>1.9</b>    | <b>0.08</b> | <b>0.66</b>       | <b>6.97</b>    |
| Grass cover & LUI                            | 5        | -1.18        | 2.23          | 0.07        | 0.73              | 9.34           |
| LUI                                          | 4        | -0.37        | 3.03          | 0.05        | 0.78              | 6.41           |
| Elevation                                    | 4        | 0.1          | 3.5           | 0.04        | 0.82              | 6.17           |
| Fire                                         | 4        | 0.36         | 3.76          | 0.03        | 0.85              | 6.04           |
| PC1                                          | 4        | 0.37         | 3.78          | 0.03        | 0.88              | 6.04           |
| Biomass extraction                           | 4        | 0.6          | 4             | 0.03        | 0.91              | 5.92           |
| Canopy openness                              | 4        | 0.91         | 4.32          | 0.02        | 0.93              | 5.77           |
| PC2                                          | 4        | 0.92         | 4.32          | 0.02        | 0.96              | 5.76           |
| Grass cover & Biomass extraction             | 5        | 0.93         | 4.34          | 0.02        | 0.98              | 8.28           |
| Biomass extraction & Livestock               | 5        | 3.29         | 6.69          | 0.01        | 0.99              | 7.11           |
| Grass cover & Biomass extraction & Livestock | 6        | 3.34         | 6.75          | 0.01        | 1                 | 10.33          |
| PC1 & PC2                                    | 5        | 5.41         | 8.82          | 0           | 1                 | 6.04           |

**Table B11.** Candidate model rankings for understory resprouting capacity (all species included).

| Model                                | K        | AICc          | $\Delta$ AICc | AICc weight | Cumulative weight | Log likelihood |
|--------------------------------------|----------|---------------|---------------|-------------|-------------------|----------------|
| <b>PC1 (-)</b>                       | <b>4</b> | <b>-11.93</b> | <b>0</b>      | <b>0.34</b> | <b>0.34</b>       | <b>12.19</b>   |
| <b>Grass cover (+)</b>               | <b>4</b> | <b>-10.98</b> | <b>0.95</b>   | <b>0.21</b> | <b>0.56</b>       | <b>11.71</b>   |
| Site only                            | 3        | -9.55         | 2.39          | 0.1         | 0.66              | 8.97           |
| PC1 & Biomass extraction             | 5        | -8.47         | 3.46          | 0.06        | 0.72              | 12.99          |
| PC1 & LUI                            | 5        | -8.19         | 3.74          | 0.05        | 0.77              | 12.85          |
| Elevation                            | 4        | -8.16         | 3.78          | 0.05        | 0.82              | 10.3           |
| PC1 & PC2                            | 5        | -7.55         | 4.39          | 0.04        | 0.86              | 12.52          |
| PC1 & Livestock                      | 5        | -7.54         | 4.39          | 0.04        | 0.9               | 12.52          |
| PC2                                  | 4        | -6.29         | 5.65          | 0.02        | 0.92              | 9.37           |
| Biomass extraction                   | 4        | -5.98         | 5.96          | 0.02        | 0.94              | 9.21           |
| Canopy openness                      | 4        | -5.72         | 6.22          | 0.02        | 0.95              | 9.08           |
| LUI                                  | 4        | -5.61         | 6.33          | 0.01        | 0.97              | 9.03           |
| Livestock                            | 4        | -5.51         | 6.42          | 0.01        | 0.98              | 8.98           |
| Fire                                 | 4        | -5.5          | 6.43          | 0.01        | 1                 | 8.97           |
| PC1 & Biomass extraction & Livestock | 6        | -1.98         | 9.96          | 0           | 1                 | 12.99          |
| Biomass extraction & Livestock       | 5        | -1.47         | 10.46         | 0           | 1                 | 9.49           |

**Table B12.** Candidate model rankings for understory seed mass (all species included).

| Model                                | K        | AICc          | $\Delta$ AICc | AICc weight | Cumulative weight | Log likelihood |
|--------------------------------------|----------|---------------|---------------|-------------|-------------------|----------------|
| <b>LUI (-)</b>                       | <b>4</b> | <b>135.03</b> | <b>0</b>      | <b>0.24</b> | <b>0.24</b>       | <b>-61.29</b>  |
| <b>Biomass extraction (-)</b>        | <b>4</b> | <b>135.52</b> | <b>0.48</b>   | <b>0.19</b> | <b>0.42</b>       | <b>-61.54</b>  |
| <b>Site only</b>                     | <b>3</b> | <b>135.8</b>  | <b>0.76</b>   | <b>0.16</b> | <b>0.59</b>       | <b>-63.7</b>   |
| <b>Livestock (-)</b>                 | <b>4</b> | <b>136.99</b> | <b>1.95</b>   | <b>0.09</b> | <b>0.68</b>       | <b>-62.27</b>  |
| PC1                                  | 4        | 137.21        | 2.18          | 0.08        | 0.76              | -62.38         |
| PC1 & LUI                            | 5        | 138.69        | 3.66          | 0.04        | 0.79              | -60.6          |
| PC1 & Livestock                      | 5        | 138.84        | 3.8           | 0.04        | 0.83              | -60.67         |
| Elevation                            | 4        | 139.07        | 4.04          | 0.03        | 0.86              | -63.32         |
| Grass cover                          | 4        | 139.54        | 4.51          | 0.02        | 0.89              | -63.55         |
| Canopy openness                      | 4        | 139.65        | 4.62          | 0.02        | 0.91              | -63.6          |
| Fire                                 | 4        | 139.82        | 4.79          | 0.02        | 0.93              | -63.69         |
| PC2                                  | 4        | 139.84        | 4.81          | 0.02        | 0.95              | -63.7          |
| Biomass extraction & Livestock       | 5        | 139.97        | 4.94          | 0.02        | 0.97              | -61.24         |
| PC1 & Biomass extraction             | 5        | 139.98        | 4.94          | 0.02        | 0.99              | -61.24         |
| PC1 & PC2                            | 5        | 142.26        | 7.23          | 0.01        | 1                 | -62.38         |
| PC1 & Biomass extraction & Livestock | 6        | 145.07        | 10.03         | 0           | 1                 | -60.53         |

**Table B13.** Candidate model rankings for understory wind dispersal (all species included).

| Model                                        | K        | AICc         | $\Delta$ AICc | AICc weight | Cumulative weight | Log likelihood |
|----------------------------------------------|----------|--------------|---------------|-------------|-------------------|----------------|
| <b>Grass cover (+)</b>                       | <b>4</b> | <b>-5.98</b> | <b>0</b>      | <b>0.64</b> | <b>0.64</b>       | <b>9.21</b>    |
| Grass cover & Livestock                      | 5        | -2.71        | 3.27          | 0.13        | 0.77              | 10.11          |
| Grass cover & Biomass extraction             | 5        | -1.67        | 4.31          | 0.07        | 0.84              | 9.58           |
| Grass cover & LUI                            | 5        | -1.18        | 4.8           | 0.06        | 0.9               | 9.34           |
| Grass cover & Biomass extraction & Livestock | 6        | -0.95        | 5.03          | 0.05        | 0.95              | 12.48          |
| PC1                                          | 4        | 1.83         | 7.8           | 0.01        | 0.96              | 5.31           |
| Elevation                                    | 4        | 1.94         | 7.92          | 0.01        | 0.98              | 5.25           |
| Site only                                    | 3        | 2.21         | 8.19          | 0.01        | 0.99              | 3.09           |
| Canopy openness                              | 4        | 4.96         | 10.93         | 0           | 0.99              | 3.74           |
| Livestock                                    | 4        | 4.99         | 10.97         | 0           | 0.99              | 3.73           |
| PC1 & PC2                                    | 5        | 5.72         | 11.7          | 0           | 0.99              | 5.89           |
| PC2                                          | 4        | 5.99         | 11.97         | 0           | 0.99              | 3.23           |
| LUI                                          | 4        | 6.08         | 12.06         | 0           | 1                 | 3.18           |
| Biomass extraction                           | 4        | 6.19         | 12.17         | 0           | 1                 | 3.13           |
| Fire                                         | 4        | 6.24         | 12.22         | 0           | 1                 | 3.1            |
| Biomass extraction & Livestock               | 5        | 7.91         | 13.89         | 0           | 1                 | 4.79           |

**Table B14.** Candidate model rankings for understory endozoochory (all species included).

| Model                                        | K        | AICc         | $\Delta$ AICc | AICc weight | Cumulative weight | Log likelihood |
|----------------------------------------------|----------|--------------|---------------|-------------|-------------------|----------------|
| <b>Livestock (+)</b>                         | <b>4</b> | <b>-9.16</b> | <b>0</b>      | <b>0.21</b> | <b>0.21</b>       | <b>10.8</b>    |
| <b>Grass cover (-) &amp; Livestock (+)</b>   | <b>5</b> | <b>-8.25</b> | <b>0.91</b>   | <b>0.13</b> | <b>0.34</b>       | <b>12.87</b>   |
| <b>Grass cover (-)</b>                       | <b>4</b> | <b>-8.08</b> | <b>1.08</b>   | <b>0.12</b> | <b>0.46</b>       | <b>10.26</b>   |
| <b>Canopy openness (+)</b>                   | <b>4</b> | <b>-7.79</b> | <b>1.37</b>   | <b>0.11</b> | <b>0.57</b>       | <b>10.12</b>   |
| <b>Site only</b>                             | <b>3</b> | <b>-7.48</b> | <b>1.68</b>   | <b>0.09</b> | <b>0.66</b>       | <b>7.94</b>    |
| Elevation                                    | 4        | -6.92        | 2.24          | 0.07        | 0.73              | 9.68           |
| Biomass extraction & Livestock               | 5        | -6.9         | 2.26          | 0.07        | 0.79              | 12.2           |
| PC2                                          | 4        | -6.75        | 2.41          | 0.06        | 0.86              | 9.6            |
| LUI                                          | 4        | -5.12        | 4.03          | 0.03        | 0.88              | 8.78           |
| Grass cover & Biomass extraction & Livestock | 6        | -4.67        | 4.48          | 0.02        | 0.91              | 14.34          |
| PC1                                          | 4        | -4.63        | 4.53          | 0.02        | 0.93              | 8.54           |
| Grass cover & LUI                            | 5        | -4.61        | 4.55          | 0.02        | 0.95              | 11.05          |
| PC1 & PC2                                    | 5        | -3.91        | 5.25          | 0.02        | 0.96              | 10.71          |
| Biomass extraction                           | 4        | -3.55        | 5.61          | 0.01        | 0.98              | 8              |
| Fire                                         | 4        | -3.48        | 5.68          | 0.01        | 0.99              | 7.96           |
| Grass cover & Biomass extraction             | 5        | -3.13        | 6.03          | 0.01        | 1                 | 10.31          |

**Table B15.** Candidate model rankings for understory exozoochory (all species included).

| Model                                        | K        | AICc         | $\Delta$ AICc | AICc weight | Cumulative weight | Log likelihood |
|----------------------------------------------|----------|--------------|---------------|-------------|-------------------|----------------|
| <b>Grass cover (+)</b>                       | <b>4</b> | <b>-3.89</b> | <b>0</b>      | <b>0.45</b> | <b>0.45</b>       | <b>8.17</b>    |
| <b>PC1 (-)</b>                               | <b>4</b> | <b>-2.49</b> | <b>1.4</b>    | <b>0.22</b> | <b>0.67</b>       | <b>7.47</b>    |
| Elevation                                    | 4        | 0.01         | 3.9           | 0.06        | 0.73              | 6.22           |
| Site only                                    | 3        | 0.27         | 4.16          | 0.06        | 0.79              | 4.07           |
| Grass cover & Livestock                      | 5        | 0.6          | 4.49          | 0.05        | 0.83              | 8.45           |
| Grass cover & Biomass extraction             | 5        | 0.74         | 4.64          | 0.04        | 0.88              | 8.38           |
| Grass cover & LUI                            | 5        | 1.15         | 5.05          | 0.04        | 0.91              | 8.17           |
| PC1 & PC2                                    | 5        | 2.16         | 6.05          | 0.02        | 0.93              | 7.67           |
| Canopy openness                              | 4        | 3.41         | 7.3           | 0.01        | 0.95              | 4.52           |
| Grass cover & Biomass extraction & Livestock | 6        | 3.47         | 7.36          | 0.01        | 0.96              | 10.26          |
| Livestock                                    | 4        | 3.65         | 7.54          | 0.01        | 0.97              | 4.4            |
| Biomass extraction                           | 4        | 4.17         | 8.06          | 0.01        | 0.98              | 4.14           |
| LUI                                          | 4        | 4.27         | 8.16          | 0.01        | 0.98              | 4.09           |
| Fire                                         | 4        | 4.28         | 8.18          | 0.01        | 0.99              | 4.08           |
| PC2                                          | 4        | 4.31         | 8.2           | 0.01        | 1                 | 4.07           |
| Biomass extraction & Livestock               | 5        | 6.98         | 10.87         | 0           | 1                 | 5.26           |

**c) Understory, excluding non-native invasive species****Table B16.** Candidate model rankings for understory maximum height (excluding non-native invasive species).

| Model                                | K        | AICc         | $\Delta$ AICc | AICc weight | Cumulative weight | Log likelihood |
|--------------------------------------|----------|--------------|---------------|-------------|-------------------|----------------|
| <b>PC2 (+)</b>                       | <b>4</b> | <b>85.27</b> | <b>0</b>      | <b>0.26</b> | <b>0.26</b>       | <b>-36.41</b>  |
| <b>Site only</b>                     | <b>3</b> | <b>86.01</b> | <b>0.74</b>   | <b>0.18</b> | <b>0.43</b>       | <b>-38.8</b>   |
| <b>Elevation (-)</b>                 | <b>4</b> | <b>86.62</b> | <b>1.35</b>   | <b>0.13</b> | <b>0.56</b>       | <b>-37.09</b>  |
| Biomass extraction                   | 4        | 87.96        | 2.69          | 0.07        | 0.63              | -37.76         |
| Grass cover                          | 4        | 88.16        | 2.89          | 0.06        | 0.69              | -37.86         |
| PC1 & PC2                            | 5        | 89.1         | 3.83          | 0.04        | 0.73              | -35.8          |
| PC2 & Biomass extraction             | 5        | 89.1         | 3.83          | 0.04        | 0.77              | -35.8          |
| Biomass extraction & Livestock       | 5        | 89.12        | 3.85          | 0.04        | 0.8               | -35.81         |
| Fire                                 | 4        | 89.41        | 4.14          | 0.03        | 0.84              | -38.48         |
| PC2 & LUI                            | 5        | 89.54        | 4.27          | 0.03        | 0.87              | -36.02         |
| PC1                                  | 4        | 89.68        | 4.41          | 0.03        | 0.89              | -38.62         |
| Canopy openness                      | 4        | 89.78        | 4.51          | 0.03        | 0.92              | -38.67         |
| Livestock                            | 4        | 89.79        | 4.53          | 0.03        | 0.95              | -38.68         |
| LUI                                  | 4        | 89.87        | 4.6           | 0.03        | 0.97              | -38.71         |
| PC2 & Livestock                      | 5        | 90.02        | 4.75          | 0.02        | 1                 | -36.26         |
| PC2 & Biomass extraction & Livestock | 6        | 95.14        | 9.87          | 0           | 1                 | -35.57         |

**Table B17.** Candidate model rankings for understory physical defense (excluding non-native invasive species).

| Model            | K        | AICc          | $\Delta$ AICc | AICc weight | Cumulative weight | Log likelihood |
|------------------|----------|---------------|---------------|-------------|-------------------|----------------|
| <b>Site only</b> | <b>3</b> | <b>-15.89</b> | <b>0</b>      | <b>0.36</b> | <b>0.36</b>       | <b>12.15</b>   |
| <b>PC1 (+)</b>   | <b>4</b> | <b>-14.54</b> | <b>1.36</b>   | <b>0.18</b> | <b>0.54</b>       | <b>13.49</b>   |
| Elevation        | 4        | -13.78        | 2.11          | 0.12        | 0.66              | 13.11          |
| Grass cover      | 4        | -13.22        | 2.67          | 0.09        | 0.76              | 12.83          |
| PC2              | 4        | -13.03        | 2.87          | 0.09        | 0.84              | 12.74          |
| Canopy openness  | 4        | -12.22        | 3.67          | 0.06        | 0.9               | 12.33          |
| Livestock        | 4        | -12.05        | 3.85          | 0.05        | 0.95              | 12.25          |
| PC1 & PC2        | 5        | -10.92        | 4.97          | 0.03        | 0.98              | 14.21          |
| PC1 & Livestock  | 5        | -9.7          | 6.19          | 0.02        | 1                 | 13.6           |

**Table B18.** Candidate model rankings for understory clonality (excluding non-native invasive species).

| Model                                        | K        | AICc         | $\Delta$ AICc | AICc weight | Cumulative weight | Log likelihood |
|----------------------------------------------|----------|--------------|---------------|-------------|-------------------|----------------|
| <b>Grass cover (+)</b>                       | <b>4</b> | <b>-7.67</b> | <b>0</b>      | <b>0.47</b> | <b>0.47</b>       | <b>10.06</b>   |
| Site only                                    | 3        | -5.17        | 2.5           | 0.13        | 0.6               | 6.79           |
| Grass cover & Livestock                      | 5        | -4.13        | 3.54          | 0.08        | 0.68              | 10.81          |
| Grass cover & LUI                            | 5        | -3.83        | 3.84          | 0.07        | 0.75              | 10.67          |
| Grass cover & Biomass extraction             | 5        | -3.17        | 4.5           | 0.05        | 0.8               | 10.33          |
| PC1                                          | 4        | -2.49        | 5.18          | 0.03        | 0.83              | 7.47           |
| Elevation                                    | 4        | -2.1         | 5.57          | 0.03        | 0.86              | 7.27           |
| Livestock                                    | 4        | -2.07        | 5.6           | 0.03        | 0.89              | 7.26           |
| Fire                                         | 4        | -1.64        | 6.03          | 0.02        | 0.91              | 7.04           |
| LUI                                          | 4        | -1.59        | 6.08          | 0.02        | 0.94              | 7.02           |
| PC2                                          | 4        | -1.38        | 6.29          | 0.02        | 0.96              | 6.91           |
| Biomass extraction                           | 4        | -1.21        | 6.46          | 0.02        | 0.97              | 6.83           |
| Canopy openness                              | 4        | -1.13        | 6.54          | 0.02        | 0.99              | 6.79           |
| Grass cover & Biomass extraction & Livestock | 6        | 2.37         | 10.03         | 0           | 0.99              | 10.82          |
| PC1 & PC2                                    | 5        | 2.47         | 10.14         | 0           | 1                 | 7.52           |
| Biomass extraction & Livestock               | 5        | 2.82         | 10.49         | 0           | 1                 | 7.34           |

**Table B19.** Candidate model rankings for understory resprouting capacity (excluding non-native invasive species).

| Model                                        | K        | AICc          | $\Delta$ AICc | AICc weight | Cumulative weight | Log likelihood |
|----------------------------------------------|----------|---------------|---------------|-------------|-------------------|----------------|
| <b>Grass cover (+)</b>                       | <b>4</b> | <b>-10.03</b> | <b>0</b>      | <b>0.4</b>  | <b>0.4</b>        | <b>11.24</b>   |
| <b>Site only</b>                             | <b>3</b> | <b>-8.38</b>  | <b>1.65</b>   | <b>0.17</b> | <b>0.57</b>       | <b>8.39</b>    |
| Grass cover & Livestock                      | 5        | -6.4          | 3.63          | 0.06        | 0.64              | 11.95          |
| Elevation                                    | 4        | -6.24         | 3.79          | 0.06        | 0.7               | 9.34           |
| PC1                                          | 4        | -6.2          | 3.83          | 0.06        | 0.75              | 9.32           |
| Grass cover & LUI                            | 5        | -5.35         | 4.68          | 0.04        | 0.79              | 11.43          |
| Livestock                                    | 4        | -5.25         | 4.78          | 0.04        | 0.83              | 8.85           |
| Grass cover & Biomass extraction             | 5        | -4.98         | 5.05          | 0.03        | 0.86              | 11.24          |
| Fire                                         | 4        | -4.76         | 5.27          | 0.03        | 0.89              | 8.6            |
| LUI                                          | 4        | -4.59         | 5.44          | 0.03        | 0.91              | 8.52           |
| PC2                                          | 4        | -4.5          | 5.53          | 0.03        | 0.94              | 8.47           |
| Canopy openness                              | 4        | -4.47         | 5.56          | 0.02        | 0.96              | 8.46           |
| Biomass extraction                           | 4        | -4.33         | 5.7           | 0.02        | 0.99              | 8.39           |
| PC1 & PC2                                    | 5        | -1.14         | 8.89          | 0           | 0.99              | 9.32           |
| Biomass extraction & Livestock               | 5        | -0.91         | 9.12          | 0           | 1                 | 9.2            |
| Grass cover & Biomass extraction & Livestock | 6        | -0.59         | 9.44          | 0           | 1                 | 12.29          |

**Table B20.** Candidate model rankings for understory seed mass (excluding non-native invasive species).

| Model                                | K        | AICc          | $\Delta$ AICc | AICc weight | Cumulative weight | Log likelihood |
|--------------------------------------|----------|---------------|---------------|-------------|-------------------|----------------|
| <b>LUI (-)</b>                       | <b>4</b> | <b>138</b>    | <b>0</b>      | <b>0.24</b> | <b>0.24</b>       | <b>-62.78</b>  |
| <b>Biomass extraction (-)</b>        | <b>4</b> | <b>138.38</b> | <b>0.39</b>   | <b>0.2</b>  | <b>0.43</b>       | <b>-62.97</b>  |
| <b>Site only</b>                     | <b>3</b> | <b>138.56</b> | <b>0.56</b>   | <b>0.18</b> | <b>0.61</b>       | <b>-65.08</b>  |
| <b>Livestock (-)</b>                 | <b>4</b> | <b>139.92</b> | <b>1.92</b>   | <b>0.09</b> | <b>0.71</b>       | <b>-63.74</b>  |
| PC1                                  | 4        | 140.61        | 2.61          | 0.06        | 0.77              | -64.08         |
| Elevation                            | 4        | 142.06        | 4.07          | 0.03        | 0.8               | -64.81         |
| PC1 & LUI                            | 5        | 142.16        | 4.17          | 0.03        | 0.83              | -62.33         |
| Grass cover                          | 4        | 142.22        | 4.22          | 0.03        | 0.86              | -64.89         |
| Canopy openness                      | 4        | 142.58        | 4.58          | 0.02        | 0.88              | -65.07         |
| PC2                                  | 4        | 142.58        | 4.59          | 0.02        | 0.91              | -65.07         |
| PC1 & Livestock                      | 5        | 142.6         | 4.6           | 0.02        | 0.93              | -62.55         |
| Fire                                 | 4        | 142.6         | 4.61          | 0.02        | 0.96              | -65.08         |
| Biomass extraction & Livestock       | 5        | 142.91        | 4.92          | 0.02        | 0.98              | -62.71         |
| PC1 & Biomass extraction             | 5        | 143.16        | 5.16          | 0.02        | 0.99              | -62.83         |
| PC1 & PC2                            | 5        | 145.64        | 7.64          | 0.01        | 1                 | -64.07         |
| PC1 & Biomass extraction & Livestock | 6        | 148.64        | 10.64         | 0           | 1                 | -62.32         |

**Table B21.** Candidate model rankings for understory wind dispersal (excluding non-native invasive species).

| Model                                               | K        | AICc         | $\Delta$ AICc | AICc weight | Cumulative weight | Log likelihood |
|-----------------------------------------------------|----------|--------------|---------------|-------------|-------------------|----------------|
| <b>Grass cover (+)</b>                              | <b>4</b> | <b>-8.74</b> | <b>0</b>      | <b>0.6</b>  | <b>0.6</b>        | <b>10.59</b>   |
| <b>Grass cover (+) &amp; Biomass extraction (+)</b> | <b>5</b> | <b>-6.76</b> | <b>1.97</b>   | <b>0.22</b> | <b>0.82</b>       | <b>12.13</b>   |
| Grass cover & LUI                                   | 5        | -4.78        | 3.96          | 0.08        | 0.91              | 11.14          |
| Grass cover & Livestock                             | 5        | -3.68        | 5.05          | 0.05        | 0.95              | 10.59          |
| Grass cover & Biomass extraction & Livestock        | 6        | -1.7         | 7.04          | 0.02        | 0.97              | 12.85          |
| PC1                                                 | 4        | -1.49        | 7.25          | 0.02        | 0.99              | 6.97           |
| Elevation                                           | 4        | 1.03         | 9.76          | 0           | 0.99              | 5.71           |
| Site only                                           | 3        | 1.43         | 10.17         | 0           | 0.99              | 3.48           |
| PC1 & PC2                                           | 5        | 3.22         | 11.95         | 0           | 1                 | 7.14           |
| Canopy openness                                     | 4        | 4.47         | 13.21         | 0           | 1                 | 3.99           |
| Biomass extraction                                  | 4        | 4.93         | 13.66         | 0           | 1                 | 3.76           |
| Livestock                                           | 4        | 5.35         | 14.08         | 0           | 1                 | 3.55           |
| PC2                                                 | 4        | 5.41         | 14.15         | 0           | 1                 | 3.52           |
| Fire                                                | 4        | 5.46         | 14.2          | 0           | 1                 | 3.49           |
| LUI                                                 | 4        | 5.46         | 14.2          | 0           | 1                 | 3.49           |
| Biomass extraction & Livestock                      | 5        | 7.98         | 16.72         | 0           | 1                 | 4.76           |

**Table B22.** Candidate model rankings for understory endozoochory (excluding non-native invasive species).

| Model                                | K        | AICc          | $\Delta$ AICc | AICc weight | Cumulative weight | Log likelihood |
|--------------------------------------|----------|---------------|---------------|-------------|-------------------|----------------|
| <b>Site only</b>                     | <b>3</b> | <b>-11.86</b> | <b>0</b>      | <b>0.22</b> | <b>0.22</b>       | <b>10.13</b>   |
| <b>PC1 (+)</b>                       | <b>4</b> | <b>-11.38</b> | <b>0.48</b>   | <b>0.18</b> | <b>0.4</b>        | <b>11.91</b>   |
| <b>Elevation (+)</b>                 | <b>4</b> | <b>-10.76</b> | <b>1.1</b>    | <b>0.13</b> | <b>0.53</b>       | <b>11.6</b>    |
| <b>Grass cover (-)</b>               | <b>4</b> | <b>-10.7</b>  | <b>1.16</b>   | <b>0.13</b> | <b>0.66</b>       | <b>11.57</b>   |
| Biomass extraction                   | 4        | -9.21         | 2.66          | 0.06        | 0.71              | 10.83          |
| Canopy openness                      | 4        | -9            | 2.86          | 0.05        | 0.77              | 10.72          |
| PC2                                  | 4        | -8.92         | 2.94          | 0.05        | 0.82              | 10.68          |
| LUI                                  | 4        | -8.09         | 3.77          | 0.03        | 0.85              | 10.27          |
| Fire                                 | 4        | -7.98         | 3.88          | 0.03        | 0.89              | 10.21          |
| Livestock                            | 4        | -7.91         | 3.95          | 0.03        | 0.92              | 10.18          |
| PC1 & PC2                            | 5        | -7.77         | 4.09          | 0.03        | 0.95              | 12.63          |
| PC1 & Livestock                      | 5        | -6.46         | 5.4           | 0.02        | 0.96              | 11.98          |
| PC1 & Biomass extraction             | 5        | -6.43         | 5.43          | 0.01        | 0.98              | 11.96          |
| PC1 & LUI                            | 5        | -6.32         | 5.54          | 0.01        | 0.99              | 11.91          |
| Biomass extraction & Livestock       | 5        | -5.6          | 6.26          | 0.01        | 1                 | 11.55          |
| PC1 & Biomass extraction & Livestock | 6        | -0.49         | 11.37         | 0           | 1                 | 12.24          |

**Table B23.** Candidate model rankings for understory exozoochory (excluding non-native invasive species).

| Model                                | K        | AICc      | $\Delta$ AICc | AICc weight | Cumulative weight | Log likelihood |
|--------------------------------------|----------|-----------|---------------|-------------|-------------------|----------------|
| <b>PC1 (-)</b>                       | <b>4</b> | <b>-7</b> | <b>0</b>      | <b>0.51</b> | <b>0.51</b>       | <b>9.72</b>    |
| Grass cover                          | 4        | -4.52     | 2.48          | 0.15        | 0.66              | 8.48           |
| PC1 & LUI                            | 5        | -3.41     | 3.59          | 0.09        | 0.75              | 10.46          |
| PC1 & Biomass extraction             | 5        | -3.39     | 3.61          | 0.08        | 0.83              | 10.45          |
| PC1 & Livestock                      | 5        | -2.91     | 4.09          | 0.07        | 0.9               | 10.2           |
| PC1 & PC2                            | 5        | -1.99     | 5.02          | 0.04        | 0.94              | 9.74           |
| Elevation                            | 4        | -0.63     | 6.37          | 0.02        | 0.96              | 6.54           |
| Site only                            | 3        | -0.44     | 6.56          | 0.02        | 0.98              | 4.42           |
| Biomass extraction                   | 4        | 2.95      | 9.95          | 0           | 0.98              | 4.75           |
| PC1 & Biomass extraction & Livestock | 6        | 3.01      | 10.01         | 0           | 0.99              | 10.49          |
| Canopy openness                      | 4        | 3.24      | 10.24         | 0           | 0.99              | 4.6            |
| PC2                                  | 4        | 3.44      | 10.44         | 0           | 0.99              | 4.5            |
| LUI                                  | 4        | 3.48      | 10.48         | 0           | 0.99              | 4.48           |
| Fire                                 | 4        | 3.51      | 10.51         | 0           | 1                 | 4.47           |
| Livestock                            | 4        | 3.57      | 10.57         | 0           | 1                 | 4.44           |
| Biomass extraction & Livestock       | 5        | 7.06      | 14.07         | 0           | 1                 | 5.22           |

**d) Saplings****Table B24.** Candidate model rankings for sapling maximum height.

| Model                                        | K        | AICc         | $\Delta$ AICc | AICc weight | Cumulative weight | Log likelihood |
|----------------------------------------------|----------|--------------|---------------|-------------|-------------------|----------------|
| <b>Site only</b>                             | <b>3</b> | <b>82.24</b> | <b>0</b>      | <b>0.27</b> | <b>0.27</b>       | <b>-36.92</b>  |
| <b>Grass cover (-)</b>                       | <b>4</b> | <b>82.62</b> | <b>0.37</b>   | <b>0.22</b> | <b>0.49</b>       | <b>-35.09</b>  |
| PC2                                          | 4        | 84.75        | 2.51          | 0.08        | 0.57              | -36.15         |
| Biomass extraction                           | 4        | 84.87        | 2.63          | 0.07        | 0.64              | -36.21         |
| Grass cover & Biomass extraction             | 5        | 85.22        | 2.98          | 0.06        | 0.7               | -33.86         |
| LUI                                          | 4        | 85.67        | 3.43          | 0.05        | 0.75              | -36.61         |
| PC1                                          | 4        | 86.1         | 3.86          | 0.04        | 0.79              | -36.83         |
| Livestock                                    | 4        | 86.13        | 3.88          | 0.04        | 0.83              | -36.84         |
| Fire                                         | 4        | 86.16        | 3.92          | 0.04        | 0.86              | -36.86         |
| Canopy openness                              | 4        | 86.21        | 3.97          | 0.04        | 0.9               | -36.88         |
| Elevation                                    | 4        | 86.24        | 4             | 0.04        | 0.94              | -36.9          |
| Grass cover & LUI                            | 5        | 86.8         | 4.56          | 0.03        | 0.97              | -34.65         |
| Grass cover & Livestock                      | 5        | 87.67        | 5.43          | 0.02        | 0.98              | -35.08         |
| PC1 & PC2                                    | 5        | 89.57        | 7.32          | 0.01        | 0.99              | -36.03         |
| Biomass extraction & Livestock               | 5        | 89.83        | 7.59          | 0.01        | 1                 | -36.17         |
| Grass cover & Biomass extraction & Livestock | 6        | 90.57        | 8.33          | 0           | 1                 | -33.29         |

**Table B25.** Candidate model rankings for sapling physical defense.

| Model            | K        | AICc        | $\Delta$ AICc | AICc weight | Cumulative weight | Log likelihood |
|------------------|----------|-------------|---------------|-------------|-------------------|----------------|
| <b>PC2 (-)</b>   | <b>4</b> | <b>2.69</b> | <b>0</b>      | <b>0.46</b> | <b>0.46</b>       | <b>4.88</b>    |
| <b>Site only</b> | <b>3</b> | <b>4.64</b> | <b>1.96</b>   | <b>0.17</b> | <b>0.63</b>       | <b>1.88</b>    |
| Canopy openness  | 4        | 5.08        | 2.39          | 0.14        | 0.77              | 3.68           |
| Elevation        | 4        | 7.53        | 4.85          | 0.04        | 0.81              | 2.46           |
| PC2 & Livestock  | 5        | 7.67        | 4.98          | 0.04        | 0.85              | 4.92           |
| Grass cover      | 4        | 7.69        | 5             | 0.04        | 0.89              | 2.38           |
| PC1 & PC2        | 5        | 7.74        | 5.05          | 0.04        | 0.92              | 4.88           |
| Livestock        | 4        | 7.97        | 5.29          | 0.03        | 0.96              | 2.24           |
| PC1              | 4        | 8.69        | 6             | 0.02        | 0.98              | 1.88           |
| Fire             | 4        | 8.92        | 6.24          | 0.02        | 1                 | 1.76           |

**Table B26.** Candidate model rankings for sapling wood density.

| Model                                | K        | AICc          | $\Delta$ AICc | AICc weight | Cumulative weight | Log likelihood |
|--------------------------------------|----------|---------------|---------------|-------------|-------------------|----------------|
| <b>PC1 (+)</b>                       | <b>4</b> | <b>-24.57</b> | <b>0</b>      | <b>0.26</b> | <b>0.26</b>       | <b>18.51</b>   |
| <b>PC1 (+) &amp; PC2 (+)</b>         | <b>5</b> | <b>-23.64</b> | <b>0.93</b>   | <b>0.16</b> | <b>0.43</b>       | <b>20.57</b>   |
| <b>Canopy openness (+)</b>           | <b>4</b> | <b>-23.15</b> | <b>1.41</b>   | <b>0.13</b> | <b>0.55</b>       | <b>17.8</b>    |
| <b>Site only</b>                     | <b>3</b> | <b>-22.77</b> | <b>1.8</b>    | <b>0.11</b> | <b>0.66</b>       | <b>15.59</b>   |
| PC1 & Biomass extraction             | 5        | -22.3         | 2.27          | 0.08        | 0.75              | 19.9           |
| PC2                                  | 4        | -21.18        | 3.39          | 0.05        | 0.79              | 16.81          |
| Fire                                 | 4        | -20.77        | 3.8           | 0.04        | 0.83              | 16.61          |
| Elevation                            | 4        | -20.48        | 4.09          | 0.03        | 0.87              | 16.46          |
| PC1 & Biomass extraction & Livestock | 6        | -20.13        | 4.44          | 0.03        | 0.89              | 22.06          |
| PC1 & LUI                            | 5        | -19.77        | 4.8           | 0.02        | 0.92              | 18.63          |
| PC1 & Livestock                      | 5        | -19.59        | 4.98          | 0.02        | 0.94              | 18.55          |
| Livestock                            | 4        | -18.85        | 5.72          | 0.02        | 0.96              | 15.65          |
| LUI                                  | 4        | -18.82        | 5.75          | 0.01        | 0.97              | 15.63          |
| Grass cover                          | 4        | -18.77        | 5.8           | 0.01        | 0.98              | 15.61          |
| Biomass extraction                   | 4        | -18.77        | 5.8           | 0.01        | 1                 | 15.61          |
| Biomass extraction & Livestock       | 5        | -13.8         | 10.77         | 0           | 1                 | 15.65          |

**Table B27.** Candidate model rankings for sapling clonality.

| Model                                | K        | AICc         | $\Delta$ AICc | AICc weight | Cumulative weight | Log likelihood |
|--------------------------------------|----------|--------------|---------------|-------------|-------------------|----------------|
| <b>Site only</b>                     | <b>3</b> | <b>-1.83</b> | <b>0</b>      | <b>0.25</b> | <b>0.25</b>       | <b>5.12</b>    |
| <b>PC2 (+)</b>                       | <b>4</b> | <b>-1.3</b>  | <b>0.53</b>   | <b>0.19</b> | <b>0.44</b>       | <b>6.87</b>    |
| <b>Elevation (-)</b>                 | <b>4</b> | <b>0.07</b>  | <b>1.9</b>    | <b>0.1</b>  | <b>0.54</b>       | <b>6.19</b>    |
| Biomass extraction                   | 4        | 0.19         | 2.02          | 0.09        | 0.63              | 6.13           |
| Canopy openness                      | 4        | 1.41         | 3.24          | 0.05        | 0.68              | 5.52           |
| PC1                                  | 4        | 1.61         | 3.44          | 0.04        | 0.72              | 5.42           |
| Grass cover                          | 4        | 1.77         | 3.6           | 0.04        | 0.76              | 5.34           |
| Fire                                 | 4        | 1.93         | 3.76          | 0.04        | 0.8               | 5.26           |
| Livestock                            | 4        | 2.06         | 3.89          | 0.04        | 0.84              | 5.19           |
| LUI                                  | 4        | 2.11         | 3.95          | 0.03        | 0.87              | 5.17           |
| Biomass extraction & Livestock       | 5        | 2.26         | 4.09          | 0.03        | 0.9               | 7.62           |
| PC1 & PC2                            | 5        | 2.58         | 4.41          | 0.03        | 0.93              | 7.46           |
| PC2 & Biomass extraction             | 5        | 2.61         | 4.44          | 0.03        | 0.96              | 7.45           |
| PC2 & LUI                            | 5        | 3.04         | 4.87          | 0.02        | 0.98              | 7.23           |
| PC2 & Livestock                      | 5        | 3.5          | 5.33          | 0.02        | 1                 | 7              |
| PC2 & Biomass extraction & Livestock | 6        | 8.59         | 10.42         | 0           | 1                 | 7.71           |

**Table B28.** Candidate model rankings for sapling resprouting capacity.

| Model                                | K        | AICc         | $\Delta$ AICc | AICc weight | Cumulative weight | Log likelihood |
|--------------------------------------|----------|--------------|---------------|-------------|-------------------|----------------|
| <b>PC1 (-)</b>                       | <b>4</b> | <b>-4.79</b> | <b>0</b>      | <b>0.33</b> | <b>0.33</b>       | <b>8.62</b>    |
| <b>Grass cover (+)</b>               | <b>4</b> | <b>-4.22</b> | <b>0.57</b>   | <b>0.25</b> | <b>0.57</b>       | <b>8.33</b>    |
| <b>Site only</b>                     | <b>3</b> | <b>-2.82</b> | <b>1.97</b>   | <b>0.12</b> | <b>0.69</b>       | <b>5.61</b>    |
| Fire                                 | 4        | -1.05        | 3.74          | 0.05        | 0.74              | 6.75           |
| Elevation                            | 4        | -0.24        | 4.55          | 0.03        | 0.78              | 6.34           |
| Biomass extraction                   | 4        | -0.2         | 4.59          | 0.03        | 0.81              | 6.32           |
| PC2 & Livestock                      | 5        | 0.14         | 4.93          | 0.03        | 0.84              | 8.68           |
| PC2 & LUI                            | 5        | 0.21         | 5             | 0.03        | 0.87              | 8.65           |
| PC1 & PC2                            | 5        | 0.22         | 5.01          | 0.03        | 0.89              | 8.64           |
| PC2 & Biomass extraction             | 5        | 0.26         | 5.05          | 0.03        | 0.92              | 8.62           |
| LUI                                  | 4        | 0.36         | 5.15          | 0.02        | 0.94              | 6.04           |
| Livestock                            | 4        | 0.97         | 5.76          | 0.02        | 0.96              | 5.74           |
| PC2                                  | 4        | 0.98         | 5.77          | 0.02        | 0.98              | 5.73           |
| Canopy openness                      | 4        | 1.22         | 6.01          | 0.02        | 1                 | 5.61           |
| Biomass extraction & Livestock       | 5        | 4.75         | 9.54          | 0           | 1                 | 6.37           |
| PC2 & Biomass extraction & Livestock | 6        | 6.6          | 11.39         | 0           | 1                 | 8.7            |

**Table B29.** Candidate model rankings for sapling seed mass.

| Model                                | K        | AICc          | $\Delta$ AICc | AICc weight | Cumulative weight | Log likelihood |
|--------------------------------------|----------|---------------|---------------|-------------|-------------------|----------------|
| <b>PC1 (+)</b>                       | <b>4</b> | <b>215.31</b> | <b>0</b>      | <b>0.42</b> | <b>0.42</b>       | <b>-101.43</b> |
| Site only                            | 3        | 217.35        | 2.04          | 0.15        | 0.57              | -104.48        |
| Elevation                            | 4        | 219.06        | 3.75          | 0.06        | 0.63              | -103.31        |
| PC1 & PC2                            | 5        | 219.23        | 3.92          | 0.06        | 0.69              | -100.87        |
| PC1 & Biomass extraction             | 5        | 219.3         | 3.99          | 0.06        | 0.75              | -100.9         |
| PC1 & LUI                            | 5        | 220.11        | 4.8           | 0.04        | 0.78              | -101.31        |
| Grass cover                          | 4        | 220.18        | 4.86          | 0.04        | 0.82              | -103.87        |
| PC1 & Livestock                      | 5        | 220.36        | 5.05          | 0.03        | 0.85              | -101.43        |
| Canopy openness                      | 4        | 220.67        | 5.36          | 0.03        | 0.88              | -104.11        |
| PC2                                  | 4        | 220.67        | 5.36          | 0.03        | 0.91              | -104.11        |
| Biomass extraction                   | 4        | 221.21        | 5.9           | 0.02        | 0.93              | -104.38        |
| LUI                                  | 4        | 221.31        | 5.99          | 0.02        | 0.95              | -104.43        |
| Fire                                 | 4        | 221.35        | 6.04          | 0.02        | 0.97              | -104.45        |
| Livestock                            | 4        | 221.39        | 6.08          | 0.02        | 0.99              | -104.47        |
| PC1 & Biomass extraction & Livestock | 6        | 224.87        | 9.56          | 0           | 1                 | -100.43        |
| Biomass extraction & Livestock       | 5        | 226.23        | 10.92         | 0           | 1                 | -104.37        |

**Table B30.** Candidate model rankings for sapling wind dispersal.

| Model                                      | K        | AICc       | $\Delta$ AICc | AICc weight | Cumulative weight | Log likelihood |
|--------------------------------------------|----------|------------|---------------|-------------|-------------------|----------------|
| <b>Elevation (-)</b>                       | <b>4</b> | <b>4.7</b> | <b>0</b>      | <b>0.47</b> | <b>0.47</b>       | <b>3.87</b>    |
| PC1 & PC2                                  | 5        | 7.75       | 3.05          | 0.1         | 0.57              | 4.87           |
| Canopy openness                            | 4        | 8.59       | 3.9           | 0.07        | 0.63              | 1.93           |
| Elevation & Livestock                      | 5        | 9.02       | 4.33          | 0.05        | 0.69              | 4.24           |
| PC2                                        | 4        | 9.03       | 4.33          | 0.05        | 0.74              | 1.71           |
| Biomass extraction & Livestock             | 5        | 9.22       | 4.53          | 0.05        | 0.79              | 4.14           |
| Elevation & LUI                            | 5        | 9.4        | 4.71          | 0.04        | 0.83              | 4.05           |
| Site only                                  | 3        | 9.6        | 4.9           | 0.04        | 0.87              | -0.6           |
| Elevation & Biomass extraction             | 5        | 9.66       | 4.97          | 0.04        | 0.91              | 3.92           |
| Fire                                       | 4        | 10.25      | 5.56          | 0.03        | 0.94              | 1.1            |
| PC1                                        | 4        | 11.09      | 6.4           | 0.02        | 0.96              | 0.68           |
| Grass cover                                | 4        | 12.1       | 7.4           | 0.01        | 0.97              | 0.17           |
| Livestock                                  | 4        | 12.12      | 7.42          | 0.01        | 0.98              | 0.16           |
| Biomass extraction                         | 4        | 13.13      | 8.43          | 0.01        | 0.99              | -0.34          |
| LUI                                        | 4        | 13.58      | 8.89          | 0.01        | 1                 | -0.57          |
| Elevation & Biomass extraction & Livestock | 6        | 14.64      | 9.95          | 0           | 1                 | 4.68           |

**Table B31.** Candidate model rankings for sapling endozoochory.

| Model                                | K        | AICc        | $\Delta$ AICc | AICc weight | Cumulative weight | Log likelihood |
|--------------------------------------|----------|-------------|---------------|-------------|-------------------|----------------|
| <b>PC2 (-)</b>                       | <b>4</b> | <b>0.92</b> | <b>0</b>      | <b>0.34</b> | <b>0.34</b>       | <b>5.76</b>    |
| <b>PC2 (-) &amp; Livestock (+)</b>   | <b>5</b> | <b>2.78</b> | <b>1.86</b>   | <b>0.13</b> | <b>0.47</b>       | <b>7.36</b>    |
| Biomass extraction & Livestock       | 5        | 2.93        | 2.01          | 0.12        | 0.59              | 7.29           |
| PC2 & LUI                            | 5        | 4.06        | 3.14          | 0.07        | 0.66              | 6.72           |
| PC1 & PC2                            | 5        | 4.39        | 3.47          | 0.06        | 0.72              | 6.55           |
| Livestock                            | 4        | 4.47        | 3.55          | 0.06        | 0.78              | 3.99           |
| Site only                            | 3        | 4.51        | 3.58          | 0.06        | 0.84              | 1.95           |
| Elevation                            | 4        | 4.79        | 3.87          | 0.05        | 0.89              | 3.83           |
| PC2 & Biomass extraction             | 5        | 5.39        | 4.47          | 0.04        | 0.92              | 6.06           |
| Canopy openness                      | 4        | 6.91        | 5.99          | 0.02        | 0.94              | 2.77           |
| PC2 & Biomass extraction & Livestock | 6        | 7.36        | 6.44          | 0.01        | 0.95              | 8.32           |
| LUI                                  | 4        | 7.39        | 6.47          | 0.01        | 0.97              | 2.53           |
| Fire                                 | 4        | 8.17        | 7.25          | 0.01        | 0.98              | 2.14           |
| PC1                                  | 4        | 8.18        | 7.26          | 0.01        | 0.98              | 2.13           |
| Grass cover                          | 4        | 8.37        | 7.45          | 0.01        | 0.99              | 2.04           |
| Biomass extraction                   | 4        | 8.52        | 7.6           | 0.01        | 1                 | 1.96           |

**Sapling exozoochory:** Too few plots with exozoochorous species to test.
